# Supplementary material for: Optimal Timing of Targeted Temperature Management for Post-Cardiac Arrest Syndrome: Is Sooner Better?
Source: MDPI journal article supplement (doi:10.3390/jcm12072628), 2023-03-31

- If the patient has shivering:

3. If still non-control, then:

[illegible][illegible]

- Remove the ArcticSun machine 24 hr after beginning the rewarm.

- 2

**Supplement S2A. Non-survivor vs. survivor groups**

|                                        | <b>Non-survivors</b><br>(N=109) | <b>Survivors</b><br>(N=68) | <b>P</b> |
|----------------------------------------|---------------------------------|----------------------------|----------|
| Age (mean, std)                        | 67.25(15.03)                    | 62.83(14.09)               | 0.0581   |
| Gender, Male                           | 68(62.39)                       | 41(60.29)                  | 0.7808   |
| APACHE II (mean, std)                  | 32.62(7.07)                     | 30.31(6.29)                | <0.001   |
| Rate of cooling (°C/h)                 | 0.42(0.28)                      | 0.33(0.18)                 | 0.0097   |
| BT at cardiac arrest (min)             | 36.25(1.20)                     | 36.19(1.21)                | 0.7495   |
| BT at ROSC (min)                       | 35.72(1.39)                     | 36.1(1.13)                 | 0.0674   |
| BT at cool start (min)                 | 35.61(1.62)                     | 36.07(1.40)                | 0.0539   |
| No/low flow time (min)                 | 33.47(42.38)                    | 21.48(16.29)               | 0.0096   |
| Pre-induction time (min)               | 330.60(173.1)                   | 396.39(266.20)             | 0.0727   |
| Induction time(min)                    | 246.13(229.27)                  | 310.6(225.9)               | 0.0690   |
| Arrest to TTM target (min) (mean, std) | 614.79(296.65)                  | 728.5(363.85)              | 0.0254   |

**Supplement S2B. OHCA vs. IHCA in the non-survivor group**

|                                        | Non-survivors<br>(N=109) |                       | <b>P</b> |
|----------------------------------------|--------------------------|-----------------------|----------|
|                                        | <b>OHCA</b><br>(n=76)    | <b>IHCA</b><br>(n=33) |          |
| Age (mean, std)                        | 66.84(15.91)             | 68.12(12.95)          | 0.6642   |
| Gender, Male                           | 46(60.53)                | 22(66.67)             | 0.5432   |
| APACHE II (mean, std)                  | 29.87(7.29)              | 32.13 (5.03)          | 0.285    |
| Rate of cooling (°C/h)                 | 0.36(0.21)               | 0.55(0.37)            | 0.0105   |
| BT at cardiac arrest (min)             | 35.91(1.07)              | 37.03(1.13)           | <0.001   |
| BT at ROSC (min)                       | 35.46(1.29)              | 36.33(1.45)           | 0.0023   |
| BT at cool start (min)                 | 35.41(1.61)              | 36.07(1.57)           | 0.0514   |
| No/low flow time (min)                 | 34.58(29.41)             | 31.00(62.75)          | 0.7557   |
| Pre-induction time (min)               | 331.20(173.20)           | 329.20(175.10)        | 0.9555   |
| Induction time(min)                    | 245.60(226.10)           | 247.50(240.10)        | 0.9680   |
| Arrest to TTM target (min) (mean, std) | 622.93(298.83)<br>(n=73) | 596.78(295.53)        | 0.6765   |

**Supplement S2C. OHCA vs. IHCA in the survivor group**

|                                        | Survivors<br>(N=68)   |                | P      |
|----------------------------------------|-----------------------|----------------|--------|
|                                        | OHCA<br>(n=60)        | IHCA<br>(n=8)  |        |
| Age (mean, std)                        | 63.48(14.68)          | 58(16.75)      | 0.3322 |
| Gender, Male                           | 35(58.33)             | 6(75)          | 0.4630 |
| APACHE II (mean, std)                  | 32.49(5.78)           | 32.94(7.44)    | 0.757  |
| Rate of cooling (°C/h)                 | 0.33(0.18)            | 0.33(0.19)     | 0.9840 |
| BT at cardiac arrest (min)             | 36.05(1.15)           | 37.26(1.20)    | 0.0075 |
| BT at ROSC (min)                       | 35.97(1.13)           | 37.01(0.75)    | 0.0147 |
| BT at cool start (min)                 | 36.07(1.39)<br>(n=59) | 36.13(1.58)    | 0.9014 |
| No/low flow time (min)                 | 21.96(14.77)          | 17.87(26.15)   | 0.6768 |
| Pre-induction time (min)               | 380.30(257.60)        | 516.90(316.80) | 0.1748 |
| Induction time(min)                    | 296.90(196.40)        | 413.60(387.0)  | 0.4275 |
| Arrest to TTM target (min) (mean, std) | 699.20(338.70)        | 948.40(487.70) | 0.1992 |

Abbreviations: OHCA: out-of-hospital cardiac arrest; IHCA: in-hospital cardiac arrest; APACHE II: acute physiology and chronic health evaluation II; BT: body temperature; ROSC: return of spontaneous circulation; CPR: cardiopulmonary resuscitation; TTM: targeted temperature management

### Supplement S3A. Good vs. poor neurologic outcome groups

|                                | Good neurologic outcome<br>(N=25) | Poor neurologic outcome<br>(N=136) | P      |
|--------------------------------|-----------------------------------|------------------------------------|--------|
| Age (mean, std)                | 57.96(13.59)                      | 66.02 (14.3)                       | 0.0068 |
| Gender, Male                   | 18(72)                            | 85 (62.5)                          | 0.4948 |
| APACHE II (mean, std)          | 27.4(5.85)                        | 32.2(6.66)                         | 0.0007 |
| Rate of cooling (°C/h)         | 0.015(0.012)                      | 0.2666 (0.036)                     | 0.096  |
| BT at cardiac arrest           | 36.47(1.01)                       | 36.26(1.21)                        | 0.6008 |
| BT at ROSC                     | 36.34(0.98)                       | 35.79(1.34)                        | 0.0499 |
| BT at cool start               | 36.68(1.15)                       | 35.65(1.56)                        | 0.0023 |
| No-low flow time               | 20.52(21.39)                      | 37.18 (49.47)                      | 0.0107 |
| Pre-induction time (mean, std) | 401.84(324.76)                    | 346.85(201.20)                     | 0.239  |
| Induction time                 | 350(224.25)                       | 257.79(223.95)                     | 0.0225 |
| Arrest to TTM target           | 772.36(403.70)                    | 640.24(311.50)                     | 0.107  |

### Supplement S3B. OHCA vs. IHCA in the good neurologic outcome group

|                                | Good neurologic outcome<br>1, 2<br>(N=25) |               | P       |
|--------------------------------|-------------------------------------------|---------------|---------|
|                                | OHCA<br>(n=21)                            | IHCA<br>(n=4) |         |
| Age (mean, std)                | 58.38(12.51)                              | 55.75(20.61)  | 0.7308  |
| Gender, Male                   | 15(71.43)                                 | 3(75)         | 0.5432  |
| APACHE II (mean, std)          | 6.66(2.81)                                | 9(3.16)       | 0.1489s |
| Rate of cooling (°C/h)         | 0.31(0.13)                                | 0.45(0.21)    | 0.09    |
| BT at cardiac arrest           | 36.28(0.88)                               | 37.42(1.24)   | 0.0360  |
| BT at ROSC                     | 36.20(0.97)                               | 37.12(0.69)   | 0.0856  |
| BT at cool start               | 36.73(1.04)<br>(n=20)                     | 36.42(1.78)   | 0.6351  |
| No-low flow time               | 17.00(13.88)                              | 28.00(36.30)  | 0.5901  |
| Pre-induction time (mean, std) | 425.50(348.90)                            | 288.50(90.44) | 0.1375  |
| Induction time                 | 339.5(203.9)                              | 405(346.8)    | 0.6032  |
| Arrest to TTM target           | 782(420.8)                                | 721.5(345.2)  | 0.7899  |

**Supplement S3C. OHCA vs. IHCA in the poor neurologic outcome group.**

|                                | Poor neurologic outcome<br>3, 4, 5.<br>(N=136) |                       | P      |
|--------------------------------|------------------------------------------------|-----------------------|--------|
|                                | <b>OHCA</b><br>(n=102)                         | <b>IHCA</b><br>(n=34) |        |
| Age (mean, std)                | 66.63(15.60)                                   | 67.35(13.17)          | 0.8015 |
| Gender, Male                   | 66(57.39)                                      | 25(67.57)             | 0.2720 |
| APACHE II (mean, std)          | 10.38(3.57)                                    | 11.27(3.54)           | 0.1895 |
| Rate of cooling (°C/h)         | 0.36(0.21)                                     | 0.52(0.37)            | 0.0168 |
| BT at cardiac arrest           | 35.92(1.14)                                    | 37.04(1.13)           | <0.001 |
| BT at ROSC                     | 35.59(1.26)                                    | 36.50(1.40)           | 0.0014 |
| BT at cool start               | 35.52(1.55)                                    | 36.04(1.55)           | 0.0753 |
| No-low flow time               | 35.94(40.61)<br>(n=112)                        | 28.48(59.62)          | 0.7952 |
| Pre-induction time (mean, std) | 339.60(179.60)                                 | 374.20(227.70)        | 0.3433 |
| Induction time                 | 255.2(214.4)                                   | 266.4(270.8)          | 0.8193 |
| Arrest to TTM target           | 648.40(319.11)                                 | 659.3(368.3)          | 0.6689 |

Abbreviations: OHCA: out-of-hospital cardiac arrest; IHCA: in-hospital cardiac arrest; APACHE II: acute physiology and chronic health evaluation II; BT: body temperature; ROSC: return of spontaneous circulation; CPR: cardiopulmonary resuscitation; TTM: targeted temperature management

**Supplement S4.** ROC curve analysis for optimal cut-off values of pre-induction and induction time.

(A) Time from ROSC to initial cooling (pre-induction time) – 28-day survival

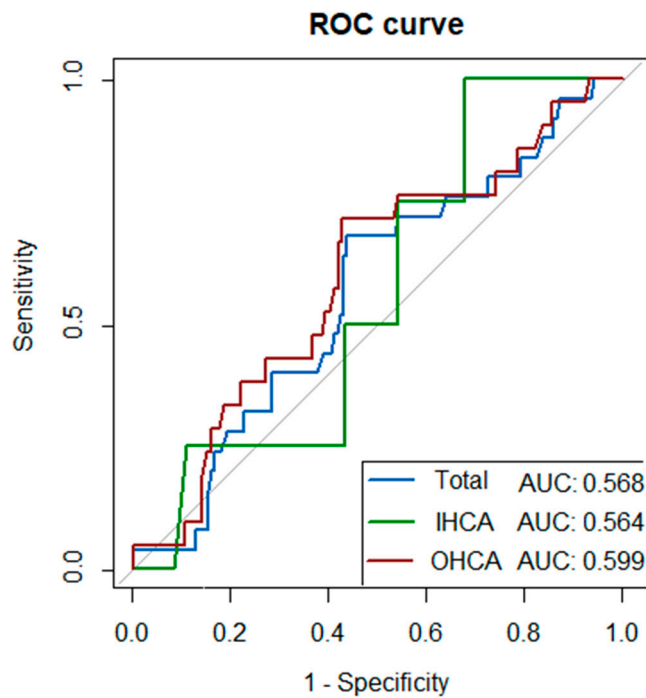

(B) Time from cooling to target temperature (induction time) – 28-day survival

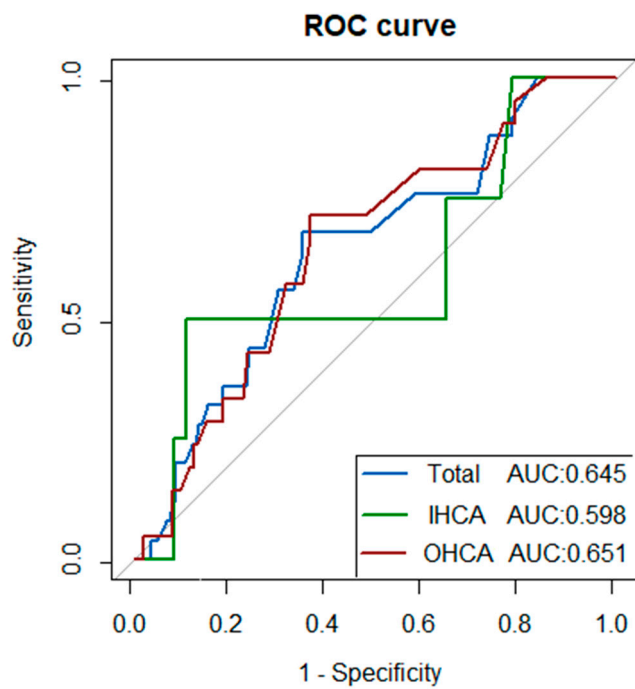

Abbreviations: OHCA: out-of-hospital cardiac arrest; IHCA: in-hospital cardiac arrest; ROSC: return of spontaneous circulation; ROC: receiver operating characteristic

**Supplement S5.** Kaplan–Meier curves of the cumulative probability of survival to day 90 (A, B) and day 180 (C, D) after cardiac arrest according to different pre-induction (A, C) and induction time (B, D).

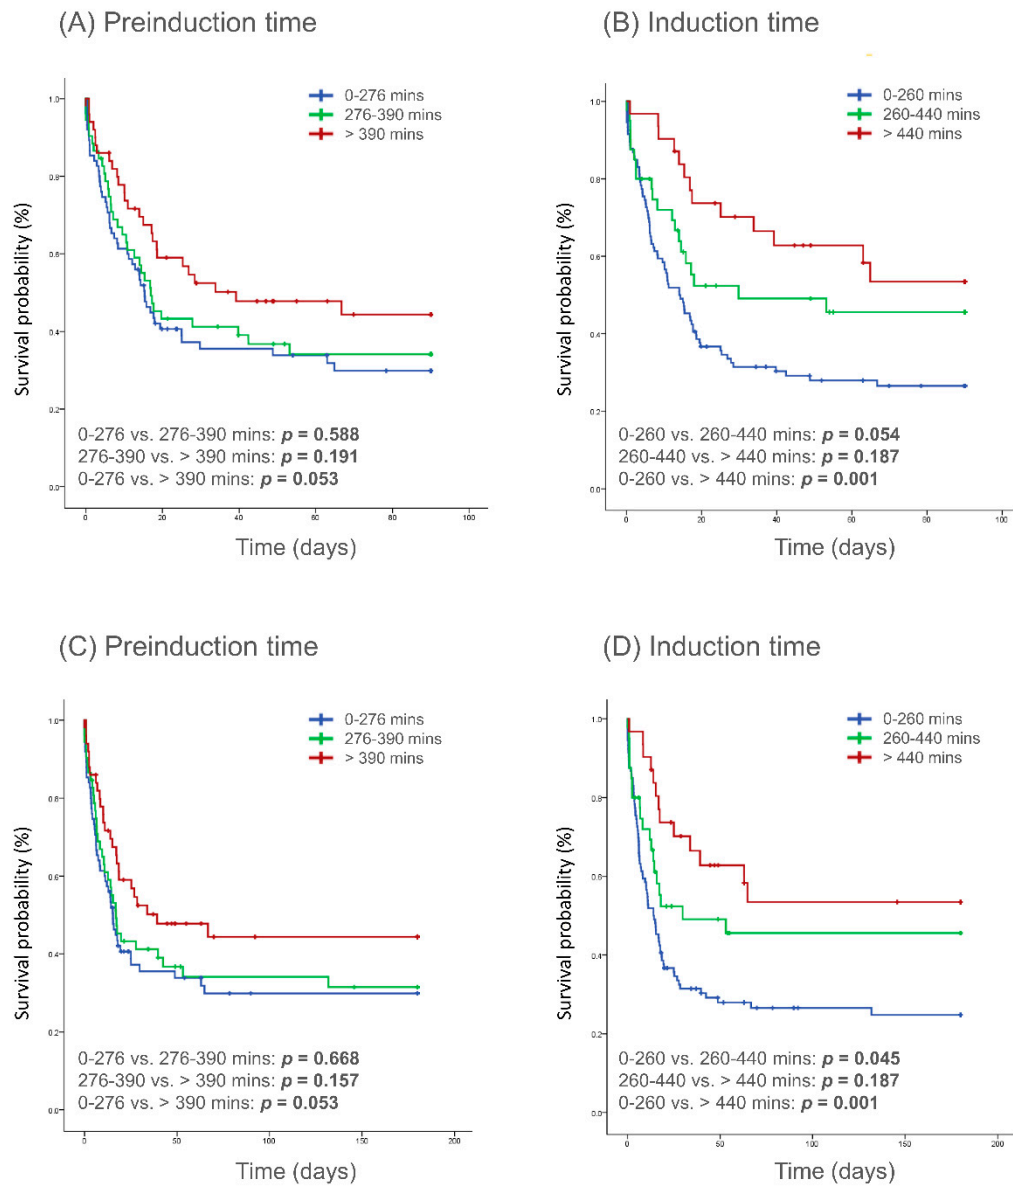

Supplement: s1 [file s1]
